# Supplementary material for: Histone Chaperone NAP1 Mediates Sister Chromatid Resolution by Counteracting Protein Phosphatase 2A
Source: PubMed Central journal article supplement (PMC3784504; doi:10.1371/journal.pgen.1003719), 2013-09-26

A

**SA IP**

**Mock *nap1* KD**

|       |    |    |
|-------|----|----|
| SMC1  | 68 | 70 |
| SMC3  | 76 | 78 |
| SA    | 66 | 63 |
| RAD21 | 34 | 32 |

# of peptides

B

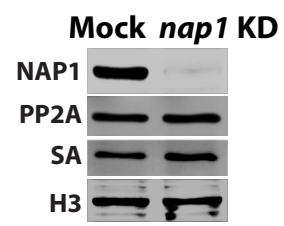

Supplement: pgen.1003719.s005.pdf [file pgen.1003719.s005.pdf]
