# Supplementary material for: Histone Chaperone NAP1 Mediates Sister Chromatid Resolution by Counteracting Protein Phosphatase 2A
Source: PubMed Central journal article supplement (PMC3784504; doi:10.1371/journal.pgen.1003719), 2013-09-26

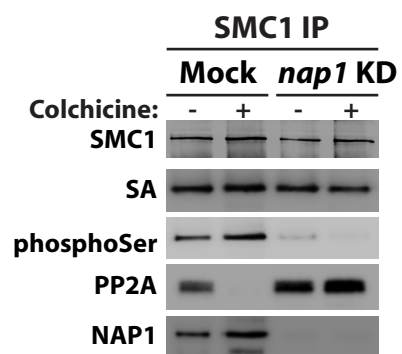

Supplement: pgen.1003719.s006.pdf [file pgen.1003719.s006.pdf]
