# Supplementary material for: Histone Chaperone NAP1 Mediates Sister Chromatid Resolution by Counteracting Protein Phosphatase 2A
Source: PubMed Central journal article supplement (PMC3784504; doi:10.1371/journal.pgen.1003719), 2013-09-26
Supplement: pgen.1003719.s008.pdf [file pgen.1003719.s008.pdf]

Table S1

| FlyBase     | Symbol         | Comments                         | MW (Da) | embryo   |       |          |       | S2 cells |       | embryo |       |      |       |
|-------------|----------------|----------------------------------|---------|----------|-------|----------|-------|----------|-------|--------|-------|------|-------|
|             |                |                                  |         | NAP1 Ab1 |       | NAP1 Ab2 |       | NAP1 Ab1 |       | SA     |       | SMC1 |       |
|             |                |                                  |         | #        | score | #        | score | #        | score | #      | score | #    | score |
| FBgn0015268 | <b>Nap1</b>    | <b>H2A/H2B histone chaperone</b> | 42782   | 24       | 1979  | 18       | 1379  | 15       | 902   | 4      | 177   | 2    | 102   |
| FBgn0040283 | <b>SMC1</b>    | <b>Cohesin subunit</b>           | 142881  | 19       | 1184  | 15       | 866   | 30       | 1952  | 91     | 5804  | 64   | 5354  |
| FBgn0015615 | <b>Cap</b>     | <b>Cohesin subunit SMC3</b>      | 140036  | 31       | 2184  | 24       | 1721  | 24       | 1747  | 97     | 6505  | 70   | 5710  |
| FBgn0260987 | <b>RAD21</b>   | <b>Cohesin subunit</b>           | 79945   | 5        | 250   | 5        | 228   | 14       | 872   | 34     | 2187  | 32   | 2515  |
| FBgn0020616 | <b>SA</b>      | <b>Cohesin subunit</b>           | 130116  | 14       | 1053  | 5        | 377   | 18       | 1225  | 67     | 4334  | 54   | 3899  |
| FBgn0004177 | <b>Mts</b>     | <b>Protein phosphatase 2A</b>    | 35469   | 6        | 403   | 3        | 200   | 3        | 217   | 5      | 328   | 4    | 277   |
| FBgn0003124 | <b>polo</b>    | <b>PLK kinase</b>                | 66974   | 7        | 476   | 2        | 106   | 3        | 153   | 4      | 195   | 1    | 41    |
| FBgn0259785 | <b>pzg</b>     | <b>CTCF/BORIS homolog</b>        | 105081  | 8        | 584   | 9        | 697   | 13       | 1054  | 17     | 725   | 14   | 1034  |
| FBgn0033890 | <b>CG13350</b> | <b>Cohesin loading CTF4</b>      | 96647   | 24       | 1678  | 27       | 1895  | 27       | 1938  | 0      | 0     | 0    | 0     |
| FBgn0026401 | <b>NipB</b>    | <b>Cohesin loading</b>           | 233824  | 0        | 0     | 0        | 0     | 0        | 0     | 23     | 755   | 4    | 340   |
| FBgn0038300 | <b>CG4203</b>  | <b>Cohesin loading MAU2</b>      | 71217   | 0        | 0     | 0        | 0     | 0        | 0     | 12     | 405   | 4    | 192   |
| FBgn0004913 | Gnf1           | RFC subunit                      | 108615  | 9        | 580   | 5        | 358   | 2        | 205   | 16     | 697   | 2    | 197   |
| FBgn0030871 | CG8142         | RFC subunit                      | 39555   | 5        | 311   | 5        | 331   | 6        | 417   | 13     | 629   | 5    | 415   |
| FBgn0260985 | Rfc4           | RFC subunit                      | 37173   | 9        | 580   | 7        | 426   | 6        | 454   | 12     | 568   | 7    | 501   |
| FBgn0028700 | Rfc38          | RFC subunit                      | 45504   | 10       | 693   | 10       | 581   | 10       | 713   | 17     | 843   | 8    | 479   |
| FBgn0032244 | Rfc3           | RFC subunit                      | 37408   | 14       | 979   | 11       | 886   | 8        | 580   | 14     | 830   | 10   | 797   |
| FBgn0022764 | Sin3A          | RLAF subunit                     | 220516  | 35       | 2589  | 27       | 1933  | 55       | 4451  | 28     | 1062  | 12   | 662   |
| FBgn0015805 | Rpd3           | RLAF subunit                     | 58331   | 14       | 1029  | 12       | 804   | 18       | 1367  | 9      | 455   | 8    | 473   |
| FBgn0031759 | LID            | RLAF subunit                     | 203993  | 46       | 3694  | 41       | 2912  | 57       | 4350  | 0      | 0     | 0    | 0     |
| FBgn0031377 | EMSY           | RLAF subunit                     | 108136  | 23       | 1642  | 16       | 1142  | 33       | 2736  | 0      | 0     | 0    | 0     |
| FBgn0029861 | PF1            | RLAF subunit                     | 98336   | 18       | 1204  | 16       | 1064  | 25       | 1747  | 0      | 0     | 0    | 0     |
| FBgn0027378 | MRG15          | RLAF subunit                     | 47194   | 11       | 789   | 11       | 849   | 10       | 851   | 0      | 0     | 0    | 0     |

Table S1

| FlyBase     | Symbol     | Comments                    | MW (Da) | embryo   |       |          |       | S2 cells |       | embryo |       |      |       |
|-------------|------------|-----------------------------|---------|----------|-------|----------|-------|----------|-------|--------|-------|------|-------|
|             |            |                             |         | NAP1 Ab1 |       | NAP1 Ab2 |       | NAP1 Ab1 |       | SA     |       | SMC1 |       |
|             |            |                             |         | #        | score | #        | score | #        | score | #      | score | #    | score |
| FBgn0014861 | Mcm2       | MCM subunit                 | 100415  | 25       | 1973  | 20       | 1600  | 22       | 1723  | 0      | 0     | 0    | 0     |
| FBgn0015929 | dpa        | MCM subunit MCM4            | 96610   | 37       | 2890  | 34       | 2743  | 37       | 2997  | 0      | 0     | 0    | 0     |
| FBgn0025815 | Mcm6       | MCM subunit                 | 92353   | 21       | 1636  | 25       | 1816  | 21       | 1296  | 0      | 0     | 0    | 0     |
| FBgn0037382 | Hpr1       | THO subunit                 | 80760   | 14       | 939   | 12       | 761   | 25       | 1981  | 0      | 0     | 0    | 0     |
| FBgn0031390 | tho2       | THO subunit                 | 188608  | 17       | 1181  | 10       | 639   | 44       | 3316  | 0      | 0     | 0    | 0     |
| FBgn0037569 | tex        | THO subunit                 | 36406   | 8        | 556   | 5        | 332   | 15       | 1209  | 0      | 0     | 0    | 0     |
| FBgn0034939 | thoc5      | THO subunit                 | 70889   | 8        | 445   | 6        | 334   | 13       | 1042  | 0      | 0     | 0    | 0     |
| FBgn0036263 | thoc6      | THO subunit                 | 39221   | 4        | 284   | 1        | 88    | 9        | 593   | 0      | 0     | 0    | 0     |
| FBgn0035110 | thoc7      | THO subunit                 | 33052   | 6        | 449   | 4        | 249   | 9        | 714   | 0      | 0     | 0    | 0     |
| FBgn0025634 | CG13367    | Transcription factor GATAD1 | 43940   | 8        | 634   | 7        | 553   | 10       | 774   | 0      | 0     | 0    | 0     |
| FBgn0004856 | Bx42       | Transcriptional regulator   | 61157   | 13       | 1005  | 9        | 671   | 18       | 1356  | 0      | 0     | 0    | 0     |
| FBgn0003607 | Su(var)205 | Chromatin silencing         | 23185   | 7        | 665   | 7        | 593   | 7        | 638   | 0      | 0     | 0    | 0     |
| FBgn0030082 | HP1b       | Chromatin silencing         | 25974   | 7        | 570   | 7        | 517   | 6        | 444   | 0      | 0     | 0    | 0     |
| FBgn0032475 | Sfmbt      | Chromatin silencing         | 133666  | 15       | 905   | 11       | 714   | 16       | 963   | 0      | 0     | 0    | 0     |
| FBgn0020496 | CtBP       | Co-repressor                | 42252   | 7        | 566   | 6        | 296   | 13       | 1147  | 0      | 0     | 0    | 0     |
| FBgn0040465 | Dip3       | Transcriptional regulator   | 39737   | 13       | 1148  | 12       | 962   | 2        | 123   | 0      | 0     | 0    | 0     |
| FBgn0014269 | prod       | Transcriptional regulator   | 39428   | 9        | 620   | 5        | 293   | 15       | 1277  | 0      | 0     | 0    | 0     |
| FBgn0026575 | hang       | Transcriptional regulator   | 209717  | 3        | 178   | 3        | 162   | 19       | 1217  | 0      | 0     | 0    | 0     |
| FBgn0033607 | CG9062     | WDR48 homolog               | 75266   | 8        | 566   | 5        | 269   | 20       | 1690  | 0      | 0     | 0    | 0     |
| FBgn0011802 | Gem3       | Dxd20 homolog               | 116508  | 28       | 2173  | 24       | 1803  | 1        | 51    | 0      | 0     | 0    | 0     |
| FBgn0259483 | Mob4       | Phocein homolog             | 25747   | 7        | 617   | 7        | 570   | 7        | 528   | 0      | 0     | 0    | 0     |
| FBgn0034987 | CG3363     | -                           | 241964  | 64       | 4511  | 46       | 2803  | 51       | 3486  | 0      | 0     | 0    | 0     |
| FBgn0029686 | CG2941     | -                           | 105015  | 26       | 1944  | 26       | 1795  | 4        | 315   | 0      | 0     | 0    | 0     |
| FBgn0036624 | CG4877     | -                           | 131942  | 24       | 1544  | 13       | 771   | 11       | 564   | 0      | 0     | 0    | 0     |

Table S1

| FlyBase     | Symbol      | Comments                  | MW (Da) | embryo   |       |          |       | S2 cells |       | embryo |       |      |       |
|-------------|-------------|---------------------------|---------|----------|-------|----------|-------|----------|-------|--------|-------|------|-------|
|             |             |                           |         | NAP1 Ab1 |       | NAP1 Ab2 |       | NAP1 Ab1 |       | SA     |       | SMC1 |       |
|             |             |                           |         | #        | score | #        | score | #        | score | #      | score | #    | score |
| FBgn0033998 | row         | Transcriptional regulator | 143681  | 0        | 0     | 0        | 0     | 11       | 886   | 11     | 416   | 4    | 250   |
| FBgn0001994 | crp         | Transcription factor AP-4 | 67163   | 0        | 0     | 0        | 0     | 13       | 898   | 9      | 433   | 13   | 759   |
| FBgn0039227 | polybromo   | PBAP subunit              | 189694  | 0        | 0     | 0        | 0     | 0        | 0     | 49     | 2263  | 9    | 535   |
| FBgn0042085 | Bap170      | PBAP subunit              | 183029  | 0        | 0     | 0        | 0     | 0        | 0     | 28     | 1285  | 4    | 213   |
| FBgn0087008 | e(y)3/SAYP  | PBAP subunit              | 212726  | 0        | 0     | 0        | 0     | 0        | 0     | 10     | 466   | 0    | 0     |
| FBgn0031947 | CG7154/BRD7 | PBAP subunit              | 95922   | 0        | 0     | 0        | 0     | 0        | 0     | 5      | 191   | 1    | 49    |
| FBgn0000212 | brm         | PBAP subunit              | 185089  | 0        | 0     | 0        | 0     | 0        | 0     | 29     | 1108  | 10   | 547   |
| FBgn0002783 | mor         | PBAP subunit              | 131361  | 0        | 0     | 0        | 0     | 0        | 0     | 23     | 1242  | 12   | 716   |
| FBgn0030093 | dalao       | PBAP subunit              | 78812   | 0        | 0     | 0        | 0     | 0        | 0     | 13     | 522   | 5    | 421   |
| FBgn0025463 | Bap60       | PBAP subunit              | 58170   | 0        | 0     | 0        | 0     | 0        | 0     | 17     | 851   | 7    | 410   |
| FBgn0025716 | Bap55       | PBAP subunit              | 47319   | 0        | 0     | 0        | 0     | 0        | 0     | 12     | 699   | 8    | 573   |
| FBgn0011715 | Snr1        | PBAP subunit              | 41911   | 0        | 0     | 0        | 0     | 0        | 0     | 8      | 321   | 7    | 476   |
| FBgn0260962 | pic/DDB1    | DDB1-CUL4 subunit         | 126045  | 0        | 0     | 0        | 0     | 0        | 0     | 13     | 452   | 20   | 1274  |
| FBgn0033260 | Cul-4       | DDB1-CUL4 subunit         | 94408   | 0        | 0     | 0        | 0     | 0        | 0     | 9      | 361   | 21   | 1370  |
| FBgn0027948 | msps        | TACC-MSPS subunit         | 226844  | 0        | 0     | 0        | 0     | 0        | 0     | 13     | 423   | 33   | 1889  |
| FBgn0026620 | tacc        | TACC-MSPS subunit         | 143966  | 0        | 0     | 0        | 0     | 0        | 0     | 4      | 128   | 21   | 1342  |
