# Supplementary material for: Histone Chaperone NAP1 Mediates Sister Chromatid Resolution by Counteracting Protein Phosphatase 2A
Source: PubMed Central journal article supplement (PMC3784504; doi:10.1371/journal.pgen.1003719), 2013-09-26
Supplement: pgen.1003719.s009.pdf [file pgen.1003719.s009.pdf]

Table S2

| FlyBase     | Symbol          | Comments                    | MW (Da) | #  | score |
|-------------|-----------------|-----------------------------|---------|----|-------|
| FBgn0004177 | <b>mts/PP2A</b> | <b>PP2A catalytic</b>       | 35469   | 14 | 969   |
| FBgn0260439 | <b>Pp2A-29B</b> | <b>PP2A regulator</b>       | 65424   | 17 | 1165  |
| FBgn0027492 | <b>wdb</b>      | <b>PP2A regulator</b>       | 59726   | 2  | 87    |
| FBgn0015268 | <b>Nap1</b>     | <b>Nap1</b>                 | 42768   | 7  | 355   |
| FBgn0020616 | <b>SA</b>       | <b>Cohesin subunit</b>      | 130116  | 8  | 397   |
| FBgn0040283 | <b>SMC1</b>     | <b>Cohesin subunit</b>      | 142881  | 7  | 384   |
| FBgn0015615 | <b>Cap</b>      | <b>Cohesin subunit SMC3</b> | 140036  | 8  | 456   |
| FBgn0260987 | <b>RAD21</b>    | <b>Cohesin subunit</b>      | 79945   | 3  | 123   |
| FBgn0026401 | <b>NipB</b>     | <b>Cohesin loading</b>      | 233883  | 12 | 581   |
| FBgn0038300 | <b>CG4203</b>   | <b>Cohesin loading MAU2</b> | 71217   | 6  | 232   |
| FBgn0031759 | LID             | RLAF subunit                | 203993  | 6  | 356   |
| FBgn0022764 | Sin3A           | RLAF subunit                | 220516  | 23 | 1179  |
| FBgn0029861 | PF1             | RLAF subunit                | 98336   | 4  | 165   |
| FBgn0015805 | Rpd3            | RLAF subunit                | 58331   | 14 | 890   |
| FBgn0027378 | MRG15           | RLAF subunit                | 47194   | 8  | 515   |
| FBgn0004103 | Pp1-87B         | PP1 catalytic               | 34542   | 8  | 537   |
| FBgn0003134 | Pp1alpha-96A    | PP1 catalytic               | 37370   | 7  | 472   |
| FBgn0000711 | flw             | PP1 catalytic               | 37740   | 4  | 206   |
| FBgn0023177 | Pp4-19C         | PP3 catalytic               | 35341   | 5  | 352   |
| FBgn0030208 | PPP4R2r         | PP4 catalytic               | 66809   | 7  | 407   |
| FBgn0005777 | PpD3            | PP5 catalytic               | 59264   | 1  | 40    |
| FBgn0003139 | PpV             | PP6 catalytic               | 34759   | 2  | 61    |
| FBgn0003124 | polo            | S/T kinase                  | 66974   | 15 | 714   |
| FBgn0024227 | ial/AurB        | S/T kinase                  | 38301   | 10 | 510   |
| FBgn0004367 | mei-41          | ATR kinase                  | 289330  | 10 | 466   |
| FBgn0045035 | tefu            | ATM kinase                  | 317991  | 5  | 270   |
| FBgn0086899 | tlk             | S/T kinase                  | 135552  | 9  | 554   |
| FBgn0015024 | CkIalpha        | Casein kinase               | 39535   | 10 | 539   |
| FBgn0264492 | CkIIalpha       | Casein kinase               | 39960   | 14 | 744   |
| FBgn0000259 | CkIIbeta        | Casein kinase               | 24829   | 5  | 255   |
| FBgn0003178 | PyK             | Pyruvate kinase             | 57440   | 15 | 827   |
| FBgn0016696 | Pitslre/cdk11A  | S/T kinase                  | 108838  | 18 | 813   |
| FBgn0015618 | Cdk8            | S/T kinase                  | 53682   | 5  | 213   |
| FBgn0027889 | ball            | VR kinase                   | 65994   | 8  | 400   |

Table S2

| <b>FlyBase</b> | <b>Symbol</b> | <b>Comments</b>          | <b>MW (Da)</b> | <b>#</b> | <b>score</b> |
|----------------|---------------|--------------------------|----------------|----------|--------------|
| FBgn0002069    | Aats-asp      | Aminoacyl-tRNA synthesis | 59059          | 17       | 1002         |
| FBgn0027084    | Aats-lys      | Aminoacyl-tRNA synthesis | 64661          | 12       | 638          |
| FBgn0027093    | Aats-arg      | Aminoacyl-tRNA synthesis | 75577          | 14       | 728          |
| FBgn0027086    | Aats-ile      | Aminoacyl-tRNA synthesis | 141099         | 25       | 1185         |
| FBgn0033351    | CG8235        | Aminoacyl-tRNA synthesis | 34401          | 6        | 253          |
| FBgn0036515    | CG12304       | Aminoacyl-tRNA synthesis | 33242          | 5        | 214          |
| FBgn0034401    | CG15100       | Aminoacyl-tRNA synthesis | 112484         | 13       | 816          |
| FBgn0053123    | CG33123       | Aminoacyl-tRNA synthesis | 134873         | 15       | 820          |
| FBgn0005674    | Aats-glupro   | Aminoacyl-tRNA synthesis | 189412         | 19       | 1041         |
| FBgn0027090    | Aats-gln      | Aminoacyl-tRNA synthesis | 87508          | 7        | 306          |
| FBgn0027081    | Aats-thr      | Aminoacyl-tRNA synthesis | 79345          | 6        | 277          |
| FBgn0051739    | mdy           | Aminoacyl-tRNA synthesis | 121520         | 9        | 484          |
| FBgn0025457    | Bub3          | cell cycle               | 37415          | 6        | 397          |
| FBgn0026326    | Mad1          | cell cycle               | 85018          | 14       | 752          |
| FBgn0020407    | Mat89Bb       | cell cycle               | 75728          | 11       | 691          |
| FBgn0027783    | SMC2          | Condensin                | 134335         | 15       | 860          |
| FBgn0014127    | barr          | Condensin                | 82762          | 8        | 393          |
| FBgn0039680    | CAP-D2        | Condensin                | 157500         | 11       | 430          |
| FBgn0015391    | glu           | Condensin                | 159883         | 10       | 499          |
| FBgn0259876    | Cap-G         | Condensin                | 153878         | 6        | 246          |
| FBgn0003732    | Top2          | DNA topoisomerase 2      | 164396         | 47       | 2710         |
| FBgn0010278    | Ssrp          | FACT complex             | 81533          | 12       | 613          |
| FBgn0002183    | dre4          | FACT complex             | 123583         | 18       | 936          |
| FBgn0040273    | Spt5          | FACT complex             | 119445         | 5        | 283          |
| FBgn0039691    | IntS11        | Integrator complex       | 67592          | 15       | 879          |
| FBgn0026679    | IntS4         | Integrator complex       | 113423         | 21       | 1207         |
| FBgn0036038    | defl          | Integrator complex       | 112288         | 19       | 1072         |
| FBgn0036570    | IntS9         | Integrator complex       | 73272          | 11       | 632          |
| FBgn0034964    | IntS1         | Integrator complex       | 235099         | 37       | 2126         |
| FBgn0038168    | omd           | Integrator complex       | 112972         | 16       | 961          |
| FBgn0030858    | IntS2         | Integrator complex       | 124890         | 15       | 838          |
| FBgn0261383    | IntS6         | Integrator complex       | 137108         | 18       | 1018         |
| FBgn0025830    | IntS8         | Integrator complex       | 113480         | 13       | 735          |
| FBgn0262117    | IntS3         | Integrator complex       | 123951         | 14       | 670          |
| FBgn0035462    | IntS10        | Integrator complex       | 72257          | 5        | 303          |
| FBgn0011604    | Iswi          | ISWI remodeler           | 118873         | 31       | 1557         |
| FBgn0034503    | MED8          | MEDIATOR                 | 27948          | 6        | 365          |
| FBgn0004597    | CycC          | MEDIATOR                 | 31292          | 5        | 267          |
| FBgn0038578    | MED17         | MEDIATOR                 | 71557          | 11       | 565          |
| FBgn0037359    | MED27         | MEDIATOR                 | 33868          | 5        | 256          |

Table S2

| <b>FlyBase</b> | <b>Symbol</b> | <b>Comments</b>  | <b>MW (Da)</b> | <b>#</b> | <b>score</b> |
|----------------|---------------|------------------|----------------|----------|--------------|
| FBgn0037024    | CG4365        | metabolism       | 34184          | 12       | 649          |
| FBgn0000150    | awd           | metabolism       | 17170          | 5        | 288          |
| FBgn0000064    | Ald           | metabolism       | 39047          | 12       | 752          |
| FBgn0000055    | Adh           | metabolism       | 27761          | 7        | 388          |
| FBgn0043456    | CG4747        | metabolism       | 65252          | 15       | 953          |
| FBgn0032350    | CG6287        | metabolism       | 35235          | 9        | 586          |
| FBgn0035811    | CG12262       | metabolism       | 45871          | 10       | 550          |
| FBgn0027588    | CG14476       | metabolism       | 105731         | 24       | 1134         |
| FBgn0001092    | Gapdh2        | metabolism       | 35369          | 7        | 471          |
| FBgn0001091    | Gapdh1        | metabolism       | 35350          | 7        | 447          |
| FBgn0033879    | CG6543        | metabolism       | 31582          | 6        | 303          |
| FBgn0027291    | l(1)G0156     | metabolism       | 40844          | 6        | 318          |
| FBgn0036030    | CG6767        | metabolism       | 42696          | 6        | 373          |
| FBgn0033160    | CG11107       | miRNA processing | 82652          | 12       | 610          |
| FBgn0015075    | Ddx1          | miRNA processing | 80869          | 5        | 240          |
| FBgn0087035    | AGO2          | miRNA processing | 136850         | 8        | 354          |
| FBgn0000253    | Cam           | NA               | 16811          | 8        | 496          |
| FBgn0013269    | FK506-bp1     | NA               | 39344          | 16       | 1002         |
| FBgn0032105    | borr          | NA               | 34681          | 13       | 888          |
| FBgn0035541    | CG15019       | NA               | 17274          | 6        | 321          |
| FBgn0086768    | Pcmt          | NA               | 24590          | 9        | 608          |
| FBgn0032731    | CG10641       | NA               | 25087          | 10       | 597          |
| FBgn0250837    | dUTPase       | NA               | 19959          | 9        | 480          |
| FBgn0051852    | Tap42         | NA               | 43319          | 14       | 821          |
| FBgn0038830    | CG17272       | NA               | 17135          | 5        | 332          |
| FBgn0015379    | dod           | NA               | 18377          | 6        | 466          |
| FBgn0037746    | CG8478        | NA               | 63116          | 15       | 855          |
| FBgn0035059    | CG3894        | NA               | 35531          | 9        | 601          |
| FBgn0004432    | Cyp1          | NA               | 24666          | 6        | 369          |
| FBgn0260991    | Incenp        | NA               | 83537          | 20       | 1292         |
| FBgn0034313    | CG5726        | NA               | 86592          | 19       | 1327         |
| FBgn0039743    | CG7946        | NA               | 52839          | 14       | 683          |
| FBgn0261524    | lic           | NA               | 38195          | 11       | 487          |
| FBgn0039274    | CG11920       | NA               | 34667          | 8        | 366          |
| FBgn0050390    | Sgf29         | NA               | 32116          | 6        | 373          |
| FBgn0027066    | Eb1           | NA               | 32576          | 7        | 406          |
| FBgn0039868    | CG11563       | NA               | 24754          | 6        | 332          |
| FBgn0025366    | Ip259         | NA               | 30029          | 7        | 392          |
| FBgn0014133    | bif           | NA               | 130091         | 27       | 1726         |
| FBgn0003187    | qua           | NA               | 100960         | 22       | 1260         |
| FBgn0004401    | Pep           | NA               | 78048          | 14       | 891          |
| FBgn0037670    | CG8436        | NA               | 27717          | 5        | 351          |

Table S2

| <b>FlyBase</b> | <b>Symbol</b> | <b>Comments</b> | <b>MW (Da)</b> | <b>#</b> | <b>score</b> |
|----------------|---------------|-----------------|----------------|----------|--------------|
| FBgn0027514    | CG1024        | NA              | 62488          | 12       | 655          |
| FBgn0015527    | pen           | NA              | 81302          | 14       | 764          |
| FBgn0033951    | CG10139       | NA              | 25513          | 5        | 276          |
| FBgn0033059    | CG7845        | NA              | 46674          | 8        | 522          |
| FBgn0033185    | CG1603        | NA              | 68326          | 12       | 648          |
| FBgn0042134    | CG18811       | NA              | 103590         | 17       | 1267         |
| FBgn0038476    | kuk           | NA              | 60160          | 11       | 631          |
| FBgn0259220    | Doa           | NA              | 67894          | 10       | 519          |
| FBgn0037261    | CG9775        | NA              | 46128          | 6        | 404          |
| FBgn0037470    | CG1091        | NA              | 63945          | 10       | 555          |
| FBgn0030959    | CG6961        | NA              | 53015          | 9        | 483          |
| FBgn0033741    | CG8545        | NA              | 99841          | 17       | 889          |
| FBgn0020392    | Nmt           | NA              | 53833          | 9        | 446          |
| FBgn0004587    | B52           | NA              | 42813          | 7        | 492          |
| FBgn0031070    | CG12702       | NA              | 97173          | 15       | 869          |
| FBgn0022349    | CG1910        | NA              | 49324          | 7        | 453          |
| FBgn0023514    | CG14805       | NA              | 55949          | 9        | 543          |
| FBgn0036248    | ssp           | NA              | 43342          | 7        | 295          |
| FBgn0039929    | CG11076       | NA              | 31841          | 5        | 248          |
| FBgn0038746    | Surf6         | NA              | 38135          | 5        | 285          |
| FBgn0030699    | CG8578        | NA              | 45402          | 7        | 483          |
| FBgn0037504    | CG1142        | NA              | 32696          | 5        | 231          |
| FBgn0020279    | lig           | NA              | 134561         | 13       | 1136         |
| FBgn0259173    | corn          | NA              | 121987         | 17       | 960          |
| FBgn0037811    | CG12592       | NA              | 75699          | 11       | 519          |
| FBgn0036886    | CG9300        | NA              | 76358          | 11       | 638          |
| FBgn0001961    | Sop2          | NA              | 41601          | 6        | 260          |
| FBgn0032859    | Arc-p34       | NA              | 35104          | 5        | 223          |
| FBgn0037621    | CG9797        | NA              | 48093          | 6        | 245          |
| FBgn0037878    | CG6693        | NA              | 34890          | 5        | 284          |
| FBgn0039627    | CG11837       | NA              | 35048          | 5        | 256          |
| FBgn0259745    | wech          | NA              | 90573          | 13       | 608          |
| FBgn0032454    | CG5787        | NA              | 100258         | 14       | 693          |
| FBgn0037810    | sle           | NA              | 158654         | 22       | 1197         |
| FBgn0030293    | CG1737        | NA              | 102112         | 14       | 920          |
| FBgn0033454    | CG1671        | NA              | 88537          | 12       | 658          |
| FBgn0011335    | l(3)j2D3      | NA              | 44830          | 5        | 250          |
| FBgn0010770    | ppan          | NA              | 53093          | 7        | 346          |
| FBgn0053505    | U3-55K        | NA              | 53286          | 7        | 305          |
| FBgn0036184    | PCID2         | NA              | 45180          | 6        | 268          |
| FBgn0031575    | Cep97         | NA              | 92644          | 12       | 644          |
| FBgn0052344    | CG6994        | NA              | 93370          | 12       | 605          |

Table S2

| <b>FlyBase</b> | <b>Symbol</b> | <b>Comments</b>         | <b>MW (Da)</b> | <b>#</b> | <b>score</b> |
|----------------|---------------|-------------------------|----------------|----------|--------------|
| FBgn0014163    | fax           | NA                      | 46644          | 6        | 376          |
| FBgn0037489    | CG1234        | NA                      | 94492          | 12       | 649          |
| FBgn0025633    | CG13366       | NA                      | 121654         | 15       | 929          |
| FBgn0030061    | CG1785        | NA                      | 55788          | 7        | 267          |
| FBgn0031314    | CG4785        | NA                      | 65049          | 8        | 474          |
| FBgn0030067    | Rbm13         | NA                      | 40586          | 5        | 313          |
| FBgn0005655    | mus209        | PCNA                    | 28830          | 5        | 342          |
| FBgn0003607    | Su(var)205    | Transcription/chromatin | 23185          | 7        | 467          |
| FBgn0040078    | pont          | Transcription/chromatin | 50242          | 18       | 1104         |
| FBgn0015610    | Caf1          | Transcription/chromatin | 48635          | 10       | 696          |
| FBgn0040075    | rept          | Transcription/chromatin | 53541          | 15       | 945          |
| FBgn0035121    | Tudor-SN      | Transcription/chromatin | 103100         | 30       | 1725         |
| FBgn0259784    | Det           | Transcription/chromatin | 17455          | 5        | 293          |
| FBgn0002780    | mod           | Transcription/chromatin | 60310          | 12       | 862          |
| FBgn0030082    | HP1b          | Transcription/chromatin | 25974          | 6        | 219          |
| FBgn0039904    | Hcf           | Transcription/chromatin | 160185         | 33       | 1730         |
| FBgn0032030    | CG17293       | Transcription/chromatin | 35355          | 7        | 330          |
| FBgn0027524    | CG3909        | Transcription/chromatin | 36100          | 7        | 383          |
| FBgn0035624    | Eaf6          | Transcription/chromatin | 24400          | 5        | 261          |
| FBgn0031769    | CG9135        | Transcription/chromatin | 53460          | 10       | 543          |
| FBgn0029704    | CG2982        | Transcription/chromatin | 73098          | 13       | 689          |
| FBgn0027951    | MTA1-like     | Transcription/chromatin | 96609          | 17       | 852          |
| FBgn0039459    | CG5491        | Transcription/chromatin | 34334          | 5        | 279          |
| FBgn0030434    | CG4400        | Transcription/chromatin | 29560          | 5        | 223          |
| FBgn0037583    | CG9684        | Transcription/chromatin | 71908          | 12       | 632          |
| FBgn0037657    | hyx           | Transcription/chromatin | 61385          | 11       | 572          |
| FBgn0031711    | CG6907        | Transcription/chromatin | 48712          | 8        | 508          |
| FBgn0027835    | Dp1           | Transcription/chromatin | 144276         | 22       | 1235         |
| FBgn0000283    | Cp190         | Transcription/chromatin | 121679         | 16       | 957          |
| FBgn0011785    | BRWD3         | Transcription/chromatin | 248662         | 33       | 1726         |
| FBgn0037624    | CG8223        | Transcription/chromatin | 51890          | 7        | 500          |
| FBgn0014269    | prod          | Transcription/chromatin | 39428          | 5        | 296          |
| FBgn0015664    | Dref          | Transcription/chromatin | 80727          | 10       | 555          |
| FBgn0028700    | RfC38         | RF-C complex            | 40815          | 12       | 788          |
| FBgn0032244    | RfC3          | RF-C complex            | 37408          | 10       | 674          |
| FBgn0260985    | RfC4          | RF-C complex            | 37173          | 9        | 507          |
| FBgn0030871    | CG8142        | RF-C complex            | 39555          | 8        | 381          |
| FBgn0031657    | CG3756        | RNA polII               | 38138          | 6        | 285          |
| FBgn0003278    | RpI135        | RNA polII               | 128444         | 9        | 462          |
| FBgn0019938    | RpI1          | RNA polII               | 185410         | 6        | 322          |
| FBgn0262955    | RpII140       | RNA polIII              | 134043         | 7        | 375          |
| FBgn0003277    | RpII215       | RNA polII               | 209168         | 5        | 185          |

Table S2

| <b>FlyBase</b> | <b>Symbol</b> | <b>Comments</b> | <b>MW (Da)</b> | <b>#</b> | <b>score</b> |
|----------------|---------------|-----------------|----------------|----------|--------------|
| FBgn0040284    | SF2           | RNA processing  | 28350          | 15       | 887          |
| FBgn0003261    | Rm62          | RNA processing  | 62474          | 29       | 1704         |
| FBgn0011692    | pav           | RNA processing  | 100667         | 32       | 2301         |
| FBgn0261789    | SmD2          | RNA processing  | 13504          | 5        | 276          |
| FBgn0261119    | Prp19         | RNA processing  | 55199          | 15       | 948          |
| FBgn0261619    | pAbp          | RNA processing  | 69925          | 22       | 1439         |
| FBgn0086897    | sqd           | RNA processing  | 36184          | 11       | 760          |
| FBgn0261014    | TER94         | RNA processing  | 88859          | 24       | 1581         |
| FBgn0034921    | Dcp1          | RNA processing  | 41359          | 11       | 697          |
| FBgn0086356    | tum           | RNA processing  | 69763          | 19       | 1304         |
| FBgn0010774    | Aly           | RNA processing  | 27852          | 7        | 401          |
| FBgn0262601    | SmB           | RNA processing  | 21021          | 6        | 303          |
| FBgn0035720    | CG10077       | RNA processing  | 88210          | 22       | 1376         |
| FBgn0037573    | eIF4AIII      | RNA processing  | 45645          | 10       | 658          |
| FBgn0031229    | CG3436        | RNA processing  | 38860          | 10       | 452          |
| FBgn0000171    | bel           | RNA processing  | 85081          | 19       | 1234         |
| FBgn0015331    | abs           | RNA processing  | 69488          | 16       | 981          |
| FBgn0014189    | Hel25E        | RNA processing  | 48652          | 10       | 520          |
| FBgn0035987    | CG3689        | RNA processing  | 26962          | 6        | 427          |
| FBgn0039558    | CG4980        | RNA processing  | 31342          | 7        | 353          |
| FBgn0260010    | rump          | RNA processing  | 66731          | 12       | 699          |
| FBgn0036735    | Edc3          | RNA processing  | 73415          | 15       | 845          |
| FBgn0035136    | CG6905        | RNA processing  | 93085          | 18       | 966          |
| FBgn0022942    | Cbp80         | RNA processing  | 93227          | 15       | 689          |
| FBgn0039566    | CG4849        | RNA processing  | 110650         | 21       | 1238         |
| FBgn0032487    | Ski6          | RNA processing  | 27022          | 5        | 279          |
| FBgn0034879    | Rrp4          | RNA processing  | 33624          | 6        | 309          |
| FBgn0014366    | noi           | RNA processing  | 58422          | 10       | 470          |
| FBgn0033688    | Prp8          | RNA processing  | 279578         | 46       | 2198         |
| FBgn0037737    | Pnn           | RNA processing  | 36380          | 6        | 364          |
| FBgn0017457    | U2af38        | RNA processing  | 29877          | 5        | 193          |
| FBgn0036548    | CG5931        | RNA processing  | 244510         | 37       | 1870         |
| FBgn0037550    | CG9667        | RNA processing  | 31352          | 5        | 282          |
| FBgn0004419    | me31B         | RNA processing  | 51945          | 8        | 415          |
| FBgn0000662    | fl(2)d        | RNA processing  | 59268          | 9        | 457          |
| FBgn0039867    | CstF-50       | RNA processing  | 46922          | 7        | 310          |
| FBgn0028382    | cyp33         | RNA processing  | 33276          | 5        | 230          |
| FBgn0035162    | CG13900-RA    | RNA processing  | 136616         | 19       | 1070         |
| FBgn0263198    | Acn           | RNA processing  | 83720          | 12       | 867          |
| FBgn0027873    | Cpsf100       | RNA processing  | 85418          | 12       | 575          |
| FBgn0022959    | yps           | RNA processing  | 38181          | 5        | 248          |
| FBgn0262734    | Rbp2          | RNA processing  | 38263          | 5        | 334          |

**Table S2**

| <b>FlyBase</b> | <b>Symbol</b> | <b>Comments</b>             | <b>MW (Da)</b> | <b>#</b> | <b>score</b> |
|----------------|---------------|-----------------------------|----------------|----------|--------------|
| FBgn0005411    | U2af50        | RNA processing              | 46655          | 6        | 333          |
| FBgn0027841    | CstF-64       | RNA processing              | 46185          | 6        | 271          |
| FBgn0032340    | Ge-1          | RNA processing              | 149251         | 19       | 1117         |
| FBgn0027548    | nito          | RNA processing              | 89053          | 11       | 452          |
| FBgn0029979    | CG10777       | RNA processing              | 100418         | 11       | 541          |
| FBgn0036340    | SRm160        | RNA processing              | 107593         | 9        | 616          |
| FBgn0031883    | CG11266       | RNA processing              | 66482          | 8        | 556          |
| FBgn0025463    | Bap60         | SWI-SNF complexes           | 58170          | 21       | 1186         |
| FBgn0025716    | Bap55         | SWI-SNF complexes           | 47319          | 13       | 765          |
| FBgn0030093    | dalao         | SWI-SNF complexes           | 78672          | 17       | 976          |
| FBgn0002783    | mor           | SWI-SNF complexes           | 131361         | 24       | 1578         |
| FBgn0000212    | brm           | SWI-SNF complexes           | 185089         | 33       | 1920         |
| FBgn0011715    | Snr1          | SWI-SNF complexes           | 41911          | 6        | 395          |
| FBgn0039227    | polybromo     | SWI-SNF complexes           | 189694         | 25       | 1409         |
| FBgn0042085    | Bap170        | SWI-SNF complexes           | 183029         | 13       | 741          |
| FBgn0261885    | osa           | SWI-SNF complexes           | 284064         | 13       | 682          |
| FBgn0027568    | Cand1         | Ubiquitin E3 ligase complex | 139355         | 6        | 282          |
| FBgn0260962    | pic           | Ubiquitin E3 ligase complex | 126045         | 21       | 1105         |
| FBgn0033260    | Cul-4         | Ubiquitin E3 ligase complex | 94408          | 19       | 924          |
