# Supplementary material for: Histone Chaperone NAP1 Mediates Sister Chromatid Resolution by Counteracting Protein Phosphatase 2A
Source: PubMed Central journal article supplement (PMC3784504; doi:10.1371/journal.pgen.1003719), 2013-09-26
Supplement: pgen.1003719.s010.pdf [file pgen.1003719.s010.pdf]

**Table S3**

| <b>gene</b>                                        | <b>region (chr.: position bp)</b> | <b>forward</b>           | <b>reverse</b>            |
|----------------------------------------------------|-----------------------------------|--------------------------|---------------------------|
| <i>HLHm<math>\alpha</math>-m<math>\beta</math></i> | 3R: 21,832,944-21,833,048         | GCCGGCGACGATGACGCTCGC    | TCGAGTAGCTGCCGTCTCGGAGCT  |
| <i>HLHm5-m6</i>                                    | 3R: 21,856,326-21,856,404         | ACCGCTCGAGACGCGTCGTGT    | CGCTGGCTTTCCGTGTATCCGTGCC |
| <i>HLHm7</i>                                       | 3R: 21,862,621-21,862,714         | TGCTCCGCAGGTGGTGGTTCTTCG | CGCCGCGAGAGCGTCTCGTGC     |
| <i>cut</i>                                         | X: 7,532,437-7,532,570            | GCGCCACCACCCAAAGGTTCAACC | ACAACAGCGCGTGTCTAGCTGCCA  |
| <i>Eip75B</i>                                      | 3L: 17,985,690-17,985,807         | TGTGCCCAGGACCGCGATGTTGT  | TGCCAGCAACAGGCCCTTGCCC    |
| <i>BrC</i>                                         | X: 1,515,021-1,515,108            | CCGCGAGGGGCGGCAACAAGTT   | TGTGCGTGTGTAGGTTGCCCGATCG |
